# Supplementary material
Source: PubMed Central journal article supplement (PMC3562302)
Supplement: cc-11-4570-s01.pdf [file cc-11-4570-s01.pdf]

## **Supplemental Material to:**

**Nathalia Meireles da Costa, Agnès Hautefeuille,  
Marie-Pierre Cros, Matias Eliseo Melendez,  
Timothy Waters, Peter Swann, Pierre Hainaut and  
Luis Felipe Ribeiro Pinto**

**Transcriptional regulation of thymine DNA glycosylase  
(TDG) by the tumor suppressor protein p53**

**Cell Cycle 2012; 11(23)**

**<http://dx.doi.org/10.4161/cc.22843>**

**<http://www.landesbioscience.com/journals/cc/article/22843>**

Figure 1: Purified human TDG probed with TDG primary antibody and total protein extract from TE-1 cells probed with TDG primary antibody and SUMO-1 antibody.

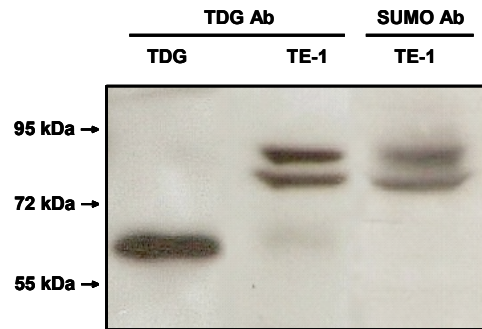

Figure 2: Binding of p53 to *p21/WAF-1* promoter by Chromatin Immunoprecipitation (ChIP) assay.

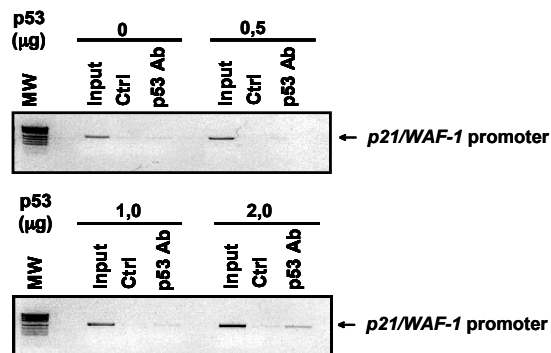

Table 1: Sequences of the oligonucleotides used for *TDG*, *TP53* and *GAPDH* amplification by Real-time quantitative RT- PCR (qRT-PCR).

|              | Forward                   | Reverse                   |
|--------------|---------------------------|---------------------------|
| <i>TDG</i>   | 5'AAGATGTGCTCAGTTTCCTCG3' | 5'TAACAGCCATCTTCTTTGC3'   |
| <i>TP53</i>  | 5'CCTATGGAACTACTTCCTG3'   | 5'AGGGGAGTACGTGCAAGT3'    |
| <i>GAPDH</i> | 5'CCGGGAACTGTGGCGTGATGG3' | 5'CCGGGAACTGTGGCGTGATGG3' |

Table 2: Antibodies used for TDG, p53, SUMO-1 and Ku-80 detection by Western blotting.

|        | Antibody                                     | Concentration | Manufacturer                      |
|--------|----------------------------------------------|---------------|-----------------------------------|
| TDG    | produced against TDG peptide<br>KEEKYDPGYEAA | 1/5000        | Dauids Biotechnologie, UK         |
| P53    | DO-7                                         | 1/4000        | Dako, Cambridgeshire, UK          |
| SUMO-1 | SUMO-1/FL-101                                | 1/1000        | Santa Cruz Biotechnology, CA, USA |
| Ku-80  | Ku-80                                        | 1/10000       | Abcam                             |

Table 3: Sequences of the oligonucleotides used for amplification of p53REs contained in *TDG* promoter region by PCR.

|               | Forward                      | Reverse                        |
|---------------|------------------------------|--------------------------------|
| p53RE1        | 5'GGTACCACCAGCACCAGAGCAATG3' | 5'GAGCTCAGTCTTACAGCAGGTGGC3'   |
| p53RE2/p53RE3 | 5'GGTACCGGCTGCTCTGAGGGTTAC3' | 5'GAGCTCTGGCTCACATTTGTAATCCT3' |

Table 4: Sequences of the mutagenic oligonucleotides used for deleting p53RE2 and p53RE3 by site-directed mutagenesis.

|        | Forward                                               | Reverse                                              |
|--------|-------------------------------------------------------|------------------------------------------------------|
| p53RE2 | 5'GGCCTGTTTCATGTCTGTAAAGTA<br>GAATTGGTGTTACATGAAAGG3' | 5'CCTTTCATGTAACACCAATTCTA<br>CTTTACAGACATGAACAGGCC3' |
| p53RE3 | 5'GTATTTTTAGTAGAGACAGG<br>GTTTTCCACCTGCCTCGGCC3'      | 5'GCCGAGGCAGGTGGAAAAC<br>CCTGTCTCTACTAAAATAC3'.      |
